# Supplementary material for: Targeted Urine Metabolomics for Monitoring Renal Allograft Injury and Immunosuppression in Pediatric Patients
Source: PubMed Central journal article supplement (PMC7465632; doi:10.3390/jcm9082341), 2020-07-22

**Supplemental Table S1: Metabolite selection by VSURF to discriminate BKVN from all other phenotypes.**

VSURF selected the following 5 metabolites to discriminate between BK and non-BK: Arabinose, 2-hydroxy-2-methylbutanoic acid, hypoxanthine, benzylalcohol, and N-acetyl-D-mannosamine to predict BKVN from a pool of samples containing BKVN and non-BKVN (AR, CAN, and STA) using all 266 metabolites.

| <b>Predicting BK vs Non-BK from 5 VSURF-selected metabolites</b>           |      |              |       |
|----------------------------------------------------------------------------|------|--------------|-------|
| Prediction                                                                 | BKVN | AR, STA, CAN | Total |
| RF(+)                                                                      | 16   | 6            | 22    |
| RF(-)                                                                      | 6    | 275          | 281   |
| Total                                                                      | 22   | 286          | 303   |
| Sensitivity=72.7%; Specificity=96.2%;<br>PPV=72.7%%; NPV=97.9%%; acc=96.0% |      |              |       |

**Supplemental Table S2: Metabolite selection by VSURF to discriminate BKVN from STA.** VSURF selected 4 metabolites: arabinose, 2-hydroxy-2-methylbutanoic acid, octadecanol, and phosphate to predict BKVN from a pool of samples containing BKVN and STA. This subset of predictors improved the prediction accuracy of the model.

| <b>Predicting BK vs. STA from 4 VSURF-selected metabolites</b>             |      |     |       |
|----------------------------------------------------------------------------|------|-----|-------|
| Prediction                                                                 | BKVN | STA | Total |
| RF(+)                                                                      | 16   | 6   | 22    |
| RF(-)                                                                      | 2    | 109 | 111   |
| Total                                                                      | 18   | 115 | 133   |
| Sensitivity=88.9%; Specificity=94.8%;<br>PPV=72.7%%; NPV=98.2%%; acc=94.0% |      |     |       |

**Supplemental Table S3: Use of all 266 metabolites in VSURF to discriminate BKVN from STA.** VSURF scores to predict BKVN from a pool of samples containing BKVN and non-BKVN (AR, CAN, and STA) using all 266 metabolites.

| <b>Predicting BK vs Non-BK from All 266 Metabolites</b>                    |      |              |       |
|----------------------------------------------------------------------------|------|--------------|-------|
| Prediction                                                                 | BKVN | AR, STA, CAN | Total |
| RF(+)                                                                      | 13   | 9            | 22    |
| RF(-)                                                                      | 1    | 277          | 278   |
| Total                                                                      | 14   | 286          | 300   |
| Sensitivity=92.9%; Specificity=96.9%;<br>PPV=59.1%%; NPV=99.6%%; acc=96.7% |      |              |       |

**Supplemental Figure S1. Volcano plot displaying fold change and significance of metabolites in the urine of acute rejection patients compared to the patients with stable grafts.** Red dots denote metabolites significant at the Bonferroni-adjusted level. The right half displays urine metabolites increased in the acute rejection relative to the stable grafts.

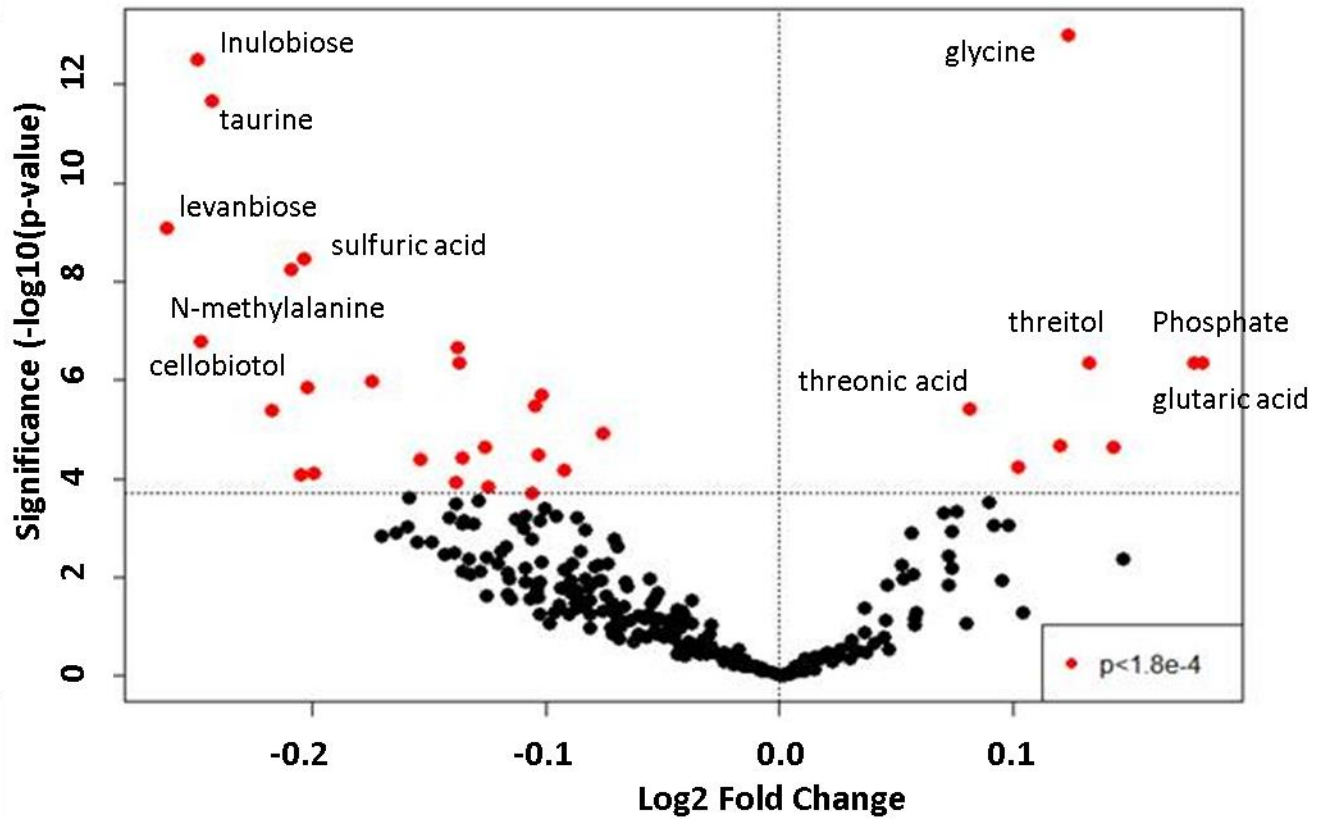

Supplement: jcm-09-02341-s001.pdf [file jcm-09-02341-s001.pdf]
